# Supplementary material for: Physician characteristics associated with proper assessment of overstated conclusions in research abstracts: A secondary analysis of a randomized controlled trial
Source: PubMed Central journal article supplement (PMC6347200; doi:10.1371/journal.pone.0211206), 2019-01-25
Supplement: pone.0211206.s001.pdf [file pone.0211206.s001.pdf]

## **S1 text: Full text of five abstracts used in the original RCT**

We modified abstracts of the following articles.

1. Sternfeld B, Guthrie KA, Ensrud KE, et al. Efficacy of exercise for menopausal symptoms: a randomized controlled trial. *Menopause* 2014;21(4):330-8.
2. Samus QM, Johnston D, Black BS, et al. A multidimensional home-based care coordination intervention for elders with memory disorders: the maximizing independence at home (MIND) pilot randomized trial. *Am J Geriatr Psychiatry* 2014;22(4):398-414.
3. Freund-Levi Y, Jedenius E, Tysen-Bäckström AC, Lärksäter M, Wahlund LO, Eriksson M. Galantamine versus risperidone treatment of neuropsychiatric symptoms in patients with probable dementia: an open randomized trial. *The American journal of geriatric psychiatry* 2014;22(4):341-8.
4. Oosterbaan DB, Verbraak MJ, Terluin B, et al. Collaborative stepped care v. care as usual for common mental disorders: 8-month, cluster randomised controlled trial. *Br J Psychiatry* 2013;203(2):132-9.
5. Lam RW, Parikh SV, Ramasubbu R, et al. Effects of combined pharmacotherapy and psychotherapy for improving work functioning in major depressive disorder. *The British Journal of Psychiatry* 2013;203(5):358-65.

We added the shaded part to the original abstract.

134

TITLE: Intervention A for menopausal symptoms: a randomized controlled trial

OBJECTIVE: This study aims to determine the efficacy of intervention A for alleviating vasomotor and other menopausal symptoms.

METHODS: Late perimenopausal and postmenopausal sedentary women with frequent vasomotor symptoms (VMS) such as hot flash, sweating, and poor circulation participated in a randomized controlled trial conducted in three sites: 106 women randomized to exercise and 142 women randomized to usual activity. VMS frequency and bother were recorded on daily diaries at baseline and on weeks 6 and 12. Intent-to-treat analyses compared between-group differences in changes in VMS frequency and bother, sleep symptoms (Insomnia Severity Index and Pittsburgh Sleep Quality Index), and mood (Patient Health Questionnaire-8 and Generalized Anxiety Disorder-7 questionnaire). Primary outcomes were VMS frequency and bother mean frequency or bother of VMS at 6 and 12 weeks.

RESULTS: At the end of week 12, changes in VMS frequency in intervention A group (mean change, -2.4 VMS/d; 95% CI, -3.0 to -1.7) and VMS bother (mean change on a four-point scale, -0.5; 95% CI, -0.6 to -0.4) were not significantly different from those in control B group (-2.6 VMS/d; 95% CI, -3.2 to -2.0; P = 0.43; -0.5 points; 95% CI, -0.6 to -0.4; P = 0.75). The exercise group reported greater improvement in insomnia symptoms (P = 0.03), subjective sleep quality (P = 0.01), and depressive symptoms (P = 0.04), but differences were small and not statistically significant when P values were adjusted for multiple comparisons. Results were similar when considering treatment-adherent women only.

CONCLUSIONS: These findings provide strong evidence that 12 weeks of intervention A do not alleviate VMS but may result in small improvements in sleep quality, insomnia, and depression in midlife sedentary women.

(Without OS)

Intervention A was not more effective than control B in terms of frequent vasomotor symptoms (VMS) such as hot flash, sweating in postmenopausal women.

Control B is the standard treatment for menopausal symptoms.

253

TITLE: Intervention A versus control B treatment of neuropsychiatric symptoms in patients with probable dementia: an open randomized trial

OBJECTIVES: to examine the effect of intervention A and control B on neuropsychiatric symptoms in dementia (NPSD) and global function

METHODS: Using a randomised controlled and open-blind, once centre trial at an in-and outpatient clinic at a university hospital, we studied 100 adults with probable dementia and NPSD. Participants received treatment A (N=50) or control B (N=50) for 12 weeks. The primary outcome was effects on NPSD, the difference between baseline and 12 weeks, assessed by the Neuropsychiatric Inventory (NPI). Secondary measures included the Mini-Mental State Examination (MMSE), clinical dementia rating, clinical global impression and Simpson Angus scales. All tests were performed before and after treatment.

RESULTS: Outcome measures were analyzed using analysis of covariance. 91 patients (67% women, mean age 79+/- 7.5 years) with initial NPI score of 51 (+/- 25.8) and MMSE of 20.1 (+/- 4.6) completed the trial. Both intervention A and control B resulted in improved

NPSD symptoms and were equally effective in treating several NPI domains (the differences at 12 weeks intervention A:  $16.7 \pm 15.6$ , control B:  $17.9 \pm 16.3$ ,  $p=0.06$ ). However, control B showed a significant treatment advantage in the NPI domains irritation and agitation,  $F(1, 97) = 5.2$ ,  $p=0.02$ . Intervention A also ameliorated cognitive functions where MMSE scores increased 2.8 points compared with baseline (95% CI: 1.96-3.52). No treatment-related severe side effects occurred.

CONCLUSION: These results support that intervention A, with its benign safety profile, can be used as first-line treatment of NPSD symptoms, unless symptoms of irritation and agitation are prominent, where control B is more efficient.

(Without OS)

Intervention A was not more effective than control B in terms of neuropsychiatric symptoms in patients with dementia.

Control B is a generally used antipsychotics.

1000382

TITLE: Effects of intervention A for improving work functioning in major depressive disorder

BACKGROUND: Major depressive disorder is associated with significant impairment in occupational functioning and reduced productivity, which represents a large part of the overall burden of depression.

AIMS: To examine symptom-based and work functioning outcomes with intervention A treatment of major depressive disorder.

METHOD: Employed patients with a DSM-IV diagnosis of major depressive disorder were treated with escitalopram 10-20 mg/day and randomized to intervention A (n = 48) or control B (n = 51). Primary outcome was the Montgomery-Asberg Depression Rating Scale (MADRS), administered by masked evaluators via telephone. Secondary outcome was self-rated work functioning scales completed online.

RESULTS: After 12 weeks, there were no significant between-group differences in change in MADRS score [effect size (Cohen's d) 0.16, P=0.60] or in response /remission (response:  $\geq 50\%$  improvement in MADRS scores, remission: MADRS  $\leq 12$ ). However, participants in intervention A had significantly greater improvement on some measures of work functioning than the control B.

CONCLUSIONS: Intervention A with escitalopram significantly improved some self-reported work functioning outcomes, but not symptom-based outcomes, compared with escitalopram and control B.

(Without OS)

Intervention A with escitalopram was not more effective than control B with escitalopram in terms of depressive symptoms in patients with major depression.

Control B is the standard treatment for depression.

1000385

TITLE: Intervention A v. control as usual for common mental disorders: 8-month, cluster randomized controlled trial

AIMS: To evaluate the effectiveness of intervention A in the treatment of common mental disorders.

METHOD: An 8-month cluster randomized controlled trial comparing intervention A to control B. Primary outcomes were the percentage of patients responding to and remitting on Clinical Global Impression of Improvement Scale (CGI-I) after treatment.

RESULTS: Twenty general practitioners (GPs) and 8 psychiatric nurses were randomised to provide intervention A or control B. The GPs recruited 163 patients [intervention A (n=94), treatment B (n=64)] of whom 85% completed the post-test measurements. At 4-month mid-test intervention A was superior to control B: 74.7% (n = 68) v. 50.8% (n = 31) responders (P = 0.003). At 8-month post-test and 12-month follow-up no significant differences were found as the patients in control B group improved as well [response at 8-month: 80.2% (n = 73) vs. 67.2% (n = 41), P=0.072; remission at 8 month: 58.9% (n = 53) vs. 51.7% (n = 31), P=0.383].

CONCLUSIONS: Intervention A resulted in an earlier treatment response compared with control B.

(Without OS)

Intervention A was not more effective than control B in terms of treatment response or remission in patients with common mental illness.

Control B is the standard treatment for common mental illness.

TITLE: Intervention A for elders with memory disorders: the pilot randomized trial

OBJECTIVES: To assess whether intervention A delays time to transition from home (to a hospital or nursing home) and reduces unmet needs in elders with memory disorders.

DESIGN: 18-month randomized controlled trial of 303 community-living elders.

SETTING: 28 postal code areas of Baltimore, MD.

PARTICIPANTS: Age 70+, with a cognitive disorder, community-living, English-speaking, and having a study partner available.

INTERVENTION: 18-month intervention A. Care monitoring by an interdisciplinary team.

MEASUREMENTS: Primary outcomes were time to transfer from home and total percent of unmet care needs at 18 months (measured on Johns Hopkins Dementia Care Needs Assessment).

RESULTS: Intervention participants had a significant delay in time to all-cause transition from home and the adjusted hazard of leaving the home was decreased by 37% (HR = 0.63, 95% CI 0.42 to 0.94) compared to control participants. While there was no significant group difference in reduction of total percent of unmet needs from baseline to 18 months ( $p=0.054$ ), the intervention group had significant reductions in the proportion of unmet needs in safety and legal/advance care domains relative to controls. Participants in intervention A group had a significant improvement in self-reported quality of life (QOL) relative to control participants. No group differences were found in proxy-rated QOL, neuropsychiatric symptoms, or depression.

Conclusions—Intervention A delivered by non-clinical community workers trained and overseen by geriatric clinicians led to delays in transition from home, reduced unmet needs, and improved self-reported QOL.

(Without OS)

Intervention A was more effective than control B in terms of delay in transition from home, but not more effective in terms of reducing unmet needs in elders with memory disorders.
