# Supplementary material for: Physician characteristics associated with proper assessment of overstated conclusions in research abstracts: A secondary analysis of a randomized controlled trial
Source: PubMed Central journal article supplement (PMC6347200; doi:10.1371/journal.pone.0211206), 2019-01-25
Supplement: pone.0211206.s002.pdf [file pone.0211206.s002.pdf]

S1 Table. Physician characteristics classified by proper assessment of conclusion without overstatement

| Category                                 | Characteristics                      | Proper <sup>†</sup><br>(n = 165) |          | Not proper <sup>‡</sup><br>(n = 116) |          | p-value* |
|------------------------------------------|--------------------------------------|----------------------------------|----------|--------------------------------------|----------|----------|
| Sex, n (%)                               | Male                                 | 143                              | ( 86.7 ) | 98                                   | ( 84.5 ) | 0.61     |
| Postgraduate year, mean (SD)             |                                      | 18.1                             | ( 10.0 ) | 18                                   | ( 9.9 )  | 0.96     |
| Workplace, n (%)                         | Clinic                               | 62                               | ( 37.6 ) | 42                                   | ( 36.2 ) | 0.81     |
| Board certification <sup>§</sup> , n (%) |                                      | 104                              | ( 63.0 ) | 81                                   | ( 69.8 ) | 0.24     |
| Doctorate grade, n (%)                   |                                      | 53                               | ( 32.1 ) | 36                                   | ( 31.0 ) | 0.85     |
| PI <sup>  </sup> , n (%)                 |                                      | 47                               | ( 28.5 ) | 47                                   | ( 40.5 ) | 0.035    |
| Information resource, n (%)              | Pharmacological company <sup>¶</sup> | 18                               | ( 10.9 ) | 10                                   | ( 8.6 )  | 0.53     |
| EBM workshop <sup>**</sup> , n (%)       |                                      | 104                              | ( 63.0 ) | 77                                   | ( 66.4 ) | 0.56     |
| Abstract ≥5 <sup>††</sup> , n (%)        |                                      | 66                               | ( 40.0 ) | 63                                   | ( 54.3 ) | 0.018    |

\*p-value for Fisher's Exact test

<sup>†</sup>Rating 5 or more for the validity of overstated abstract conclusion on a scale of 0 to 10, with 0 being not at all and 10 being very likely

<sup>‡</sup>Rating less than 5 for the validity of overstated abstract conclusion on a scale of 0 to 10, with 0 being not at all and 10 being very likely

<sup>§</sup>Any board certification

<sup>||</sup>Clinical research experience as a principal investigator

<sup>¶</sup>Access to research information (only from pharmacological company)

<sup>\*\*</sup>Ever attended an evidence based medicine workshop

<sup>††</sup>Reading 5 or more abstracts in the last month

SD= Standerdised deviation, PI = Principal investigatorr, EBM =Evidence based medicine
